# Supplementary figures and images for: New Class of Benzodiazepinone Derivatives as Pro-Death Agents Targeting BIR Domains in Cancer Cells
Source: MDPI journal article supplement (doi:10.3390/molecules28010446), 2023-01-03

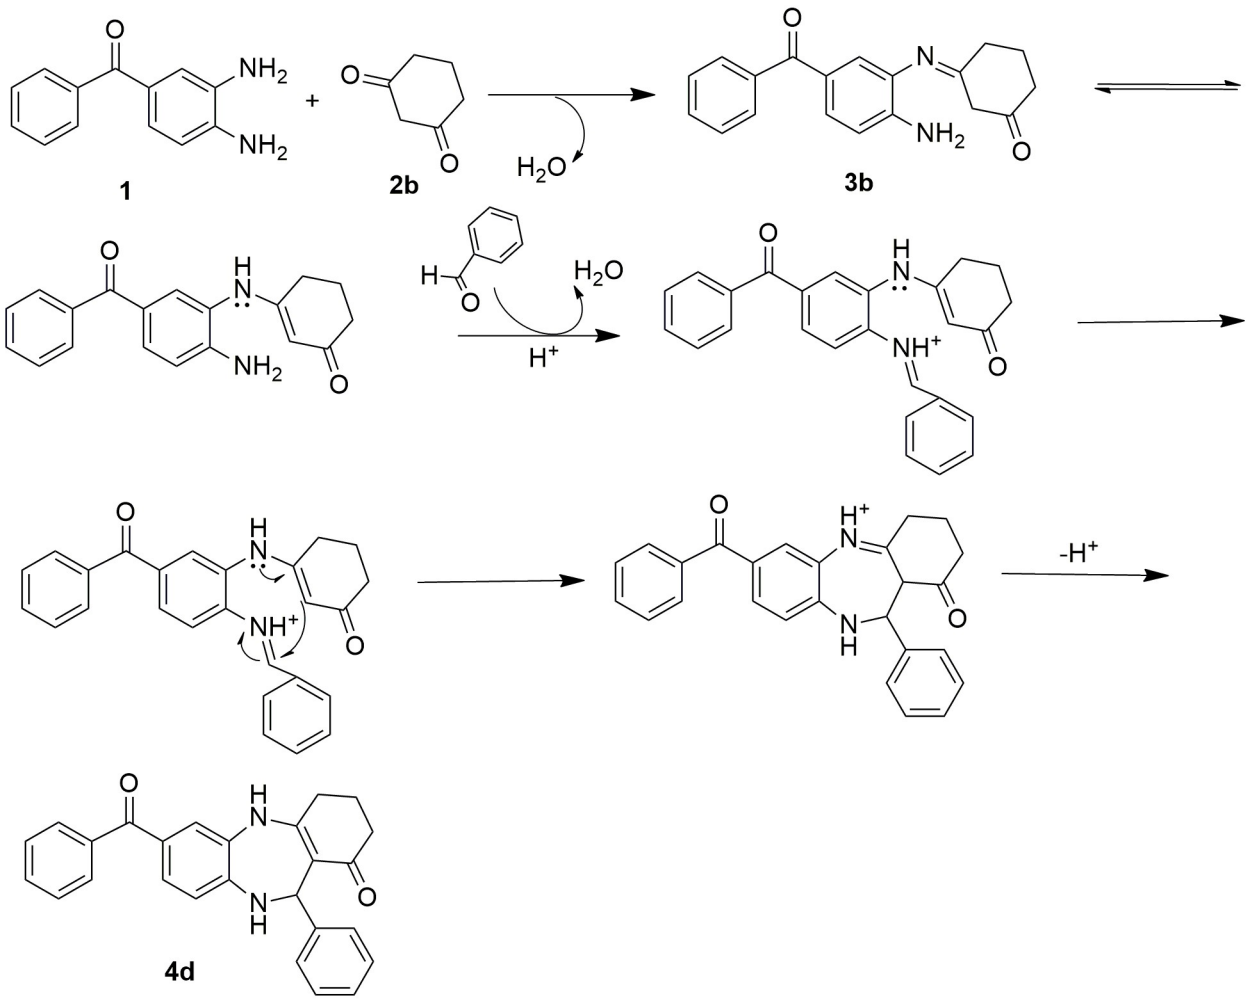

Supplement: s1 [file s1]
